# Supplementary material for: Protease nexin 1 induces apoptosis of prostate tumor cells through inhibition of X-chromosome-linked inhibitor of apoptosis protein
Source: PubMed Central journal article supplement (PMC4414153; doi:10.18632/oncotarget.2921), 2015-02-17
Supplement: oncotarget-06-3784-s001.pdf [file oncotarget-06-3784-s001.pdf]

## SUPPLEMENTARY FIGURES

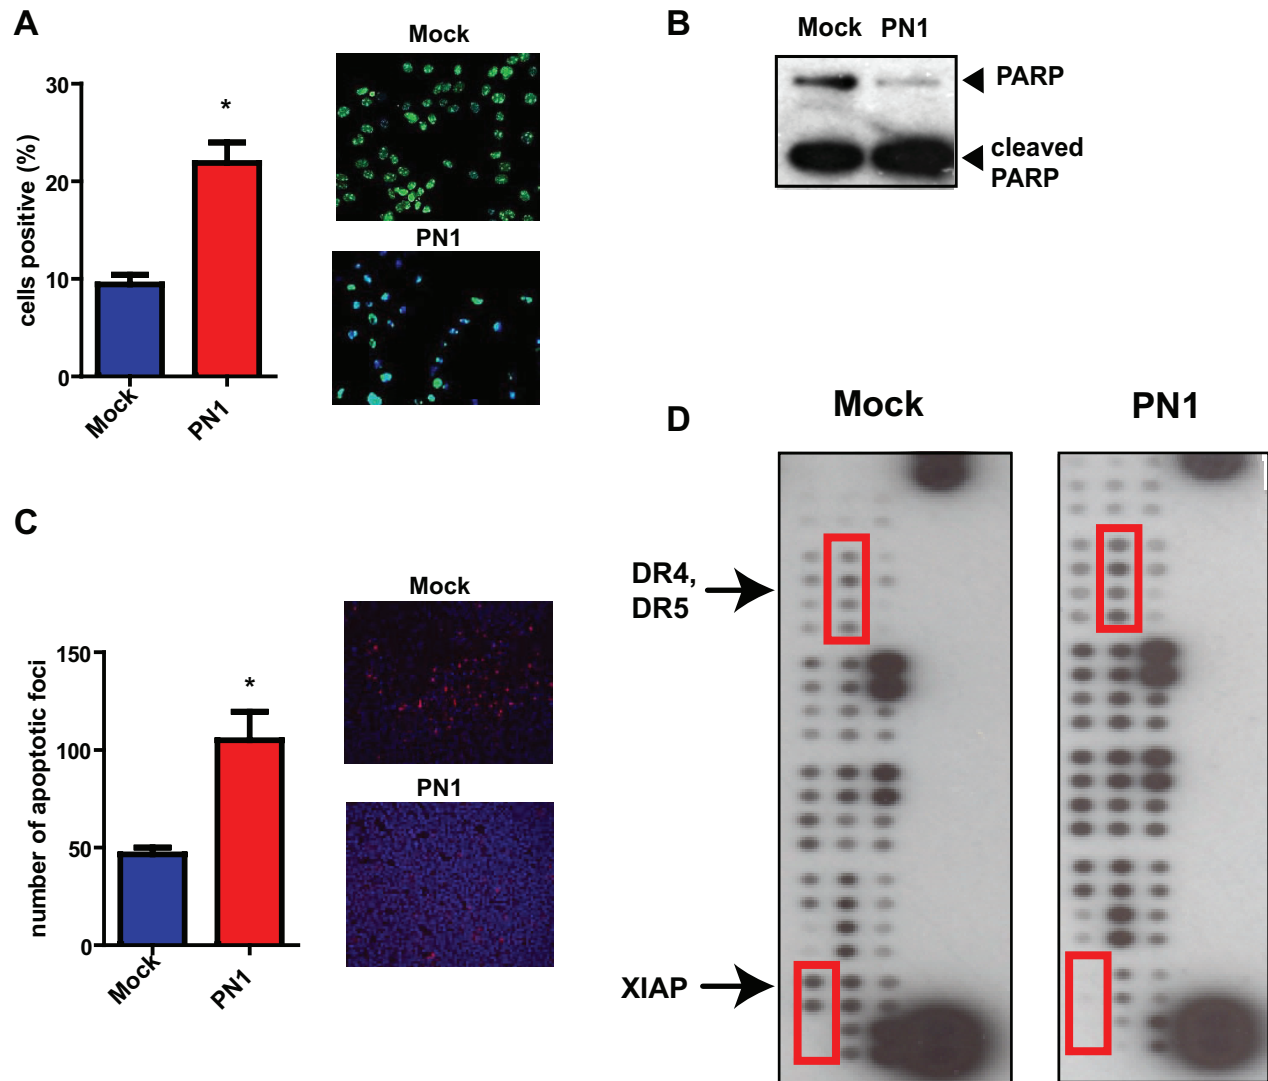

**Supplementary Figure 1: PN1 induces apoptosis in prostate metastatic cells.** (A) PC3 cells ( $1 \times 10^5$ ) transfected with  $2 \mu\text{g}$  mock or PN1 expressing vector were measured for apoptosis *via* TUNEL. Cells with positive PN1 (green stain) were counted from 9 individual microscopic fields and plotted (*t*-test,  $*P < 0.05$ ). Blue staining represents nuclei. (B) Reduction of full-length PARP to its cleaved form was observed PC3 transfection. (C) Tissues of PC3 xenografts or xenografts pre-treated with PN1 ( $10 \mu\text{M}$ ) tested for apoptosis *via* TUNEL. Apoptotic foci (red stain) were counted and plotted (*t*-test,  $*P < 0.05$ ). (D) Whole lysates ( $300 \mu\text{g}$ ) of PC3 cells treated with  $2 \mu\text{g}$  of pcDNA3-PN1 or vehicle only were collected and incubated on an apoptotic array ( $N = 3$ , one-way ANOVA,  $p < 0.05$ ). Red boxed areas indicate protein level differences in XIAP or death receptors in response to PN1 treatment.

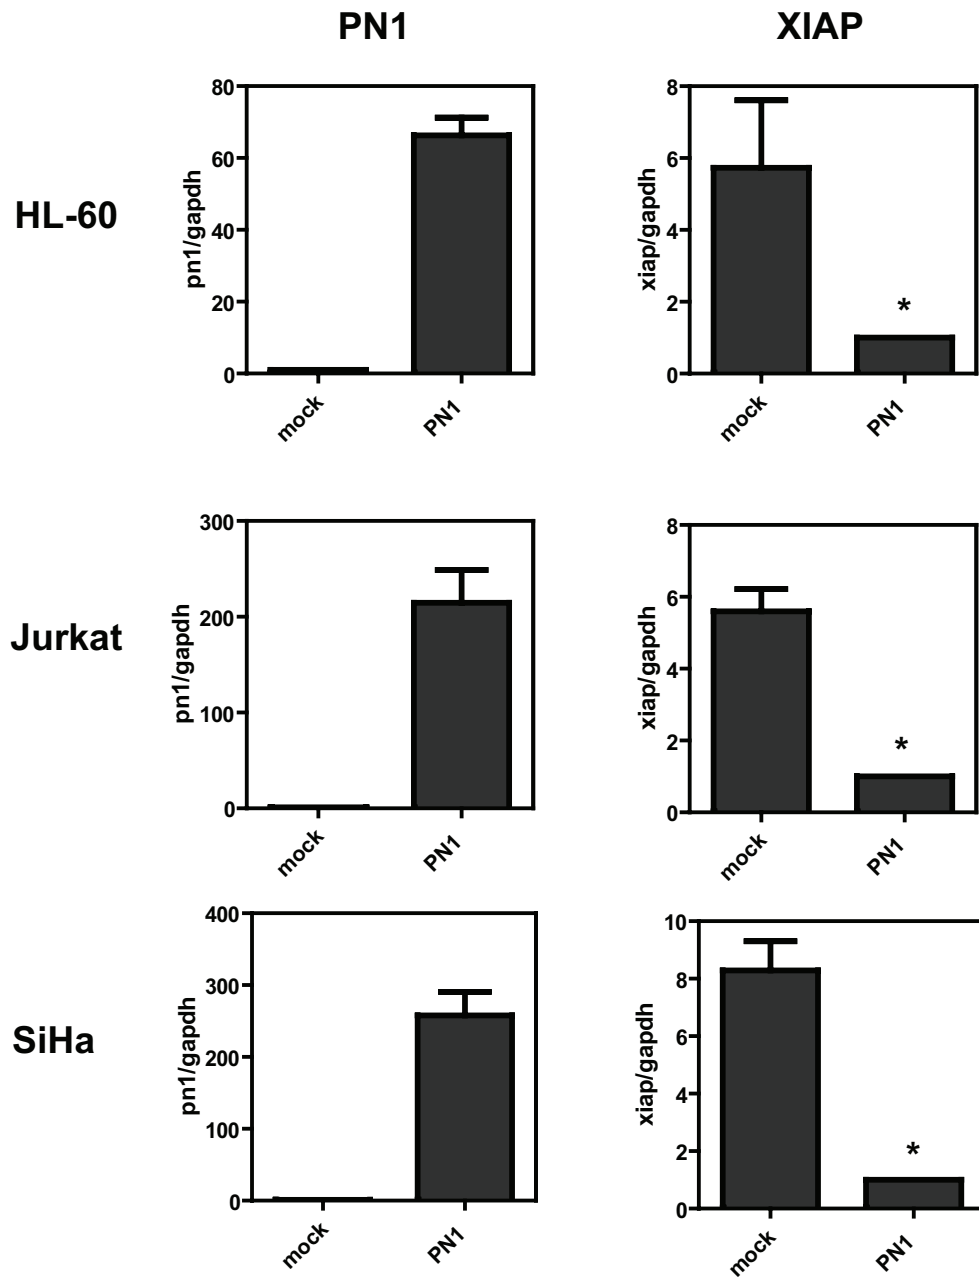

**Supplementary Figure 2: XIAP expression is transcriptionally inhibited by PN1 in leukemic and cervical cancer cell lines.** Two common human leukaemia cell lines (HL-60 and Jurkat) and a cervical cancer cell line (SIHA) were tested to determine if PN1 expression reduced *xiap* mRNA levels. Transcripts were analysed using qRT-PCR ( $N = 3$ ,  $t$ -test,  $P < 0.01$ ).

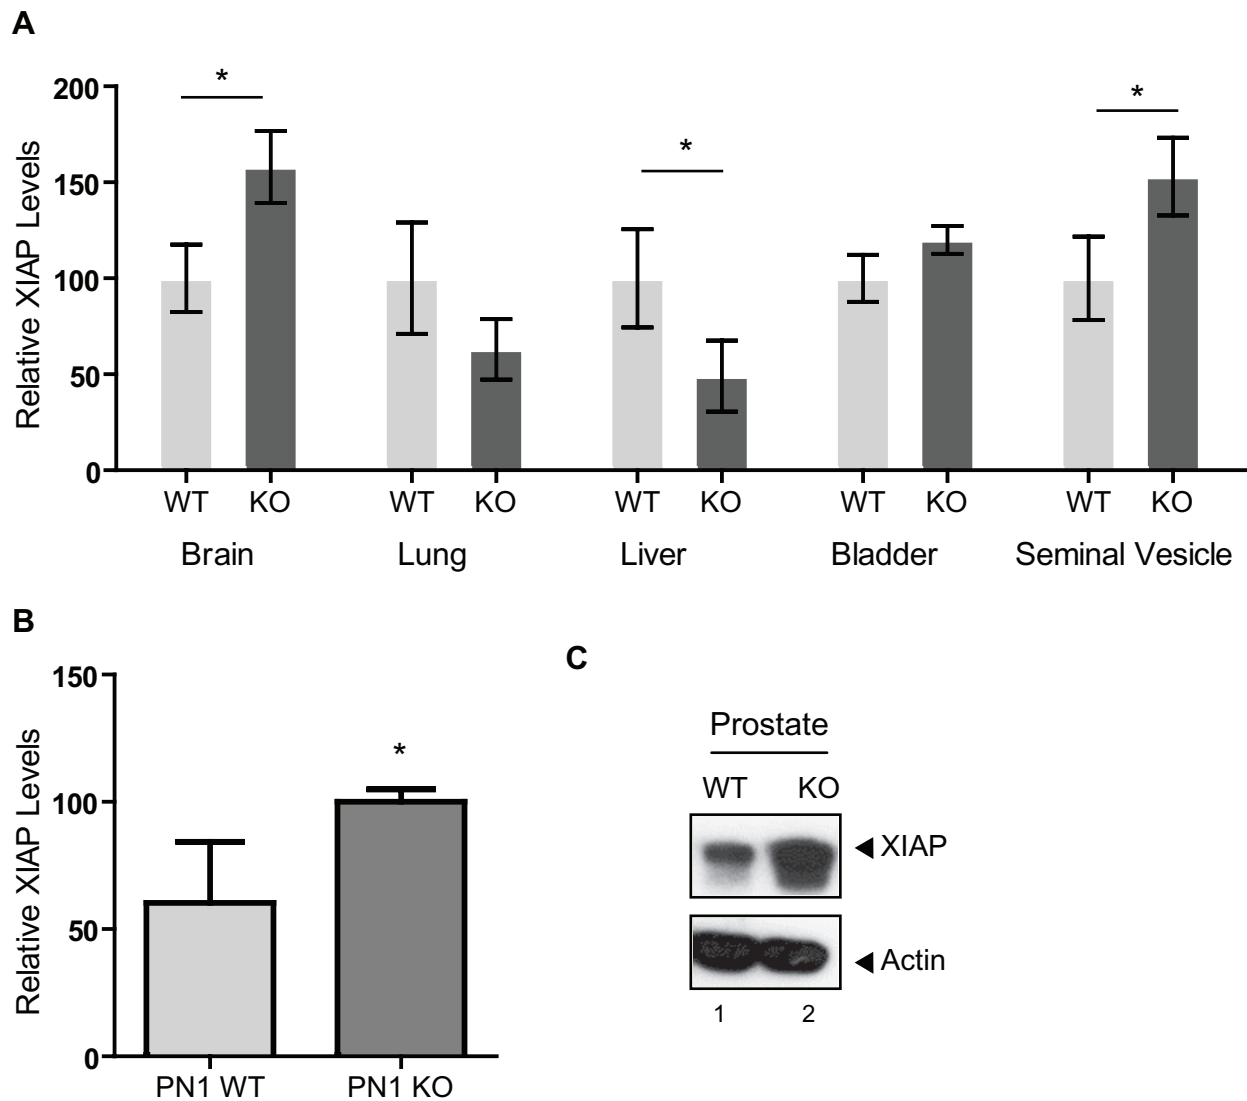

**Supplementary Figure 3: XIAP expression is mouse tissues.** (A) Lysates of organs from C57B/6 wild type or PN1 KO were tested for differences in XIAP protein levels using a sandwich ELISA ( $N = 4$ , one-way ANOVA,  $*P < 0.01$ ). (B) Lysates of prostates from C57B/6 wild type or PN1 KO were tested for differences in XIAP protein levels using a sandwich ELISA ( $N = 4$ , one-way ANOVA,  $*P < 0.01$ ). (C) Immunoblotting of lysates from wild type or knock-out prostates lysates and probing for XIAP protein ( $N = 3$ ).

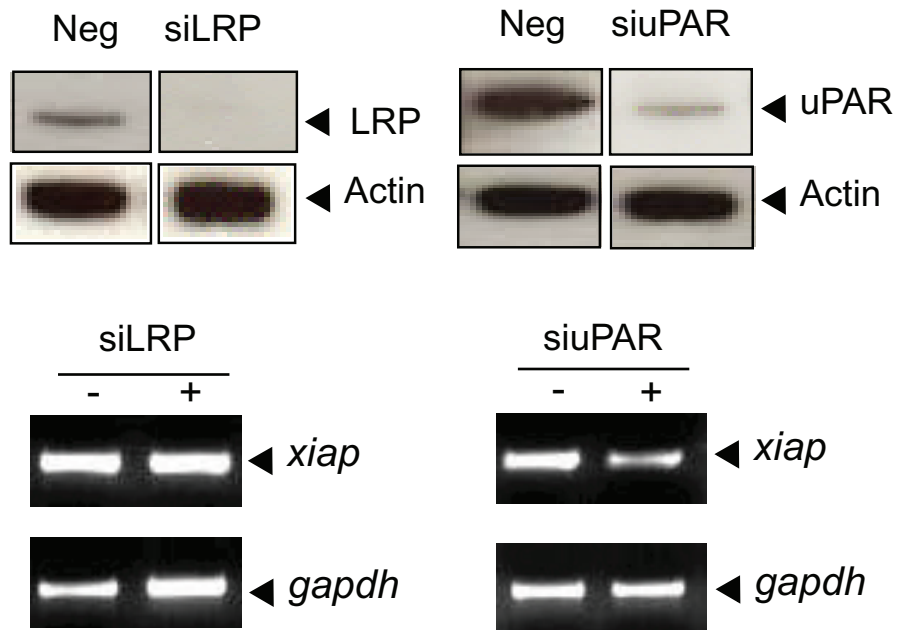

**Supplementary Figure 4: uPAR is important for *xiap* transcript expression.** Immunoblotting of LRP or uPAR silenced by 10 nM siRNA in PC3 cells (above) and measurements of *xiap* mRNA following knock-down (below). *gapdh* is used as a template control.
